# Supplementary material for: Dietary Supplementation of EGF Ameliorates the Negatively Effects of LPS on Early-Weaning Piglets: From Views of Growth Performance, Nutrient Digestibility, Microelement Absorption and Possible Mechanisms
Source: MDPI journal article supplement (doi:10.3390/ani11061598), 2021-05-28
Supplement: s1 [file s1]

# Supplementary Table S1

The primers for quantitative real-time PCR.

| Gene  | Primer sequence (5' to 3')                            | Accession number | Size, bp |
|-------|-------------------------------------------------------|------------------|----------|
| Zip4  | F: TGGCTGTGTATGGGCTGTCT<br>R: ACTGGCTGAGCTGGTCCTG     | JF346412.1       | 141      |
| Zip7  | F: TCCAGGCATCAAGCAAGA<br>R: CCACCCGAAGCAAACT          | NM_001131045.1   | 171      |
| ZnT1  | F: AACCGACCAGGAGGAGAC<br>R: TACTACAATCACGGAACCCA      | FJ374262.1       | 244      |
| ZnT4  | F: GTGGACCCCTGTGACAACTG<br>R: CTGACAAGACCTCTAAGCGATG  | EU835903.1       | 277      |
| Ctrl  | F: CCTATGACCTTCTACTTTGGCTT<br>R: CGGGCTATCTTGAGTCCTTC | AF320815.2       | 137      |
| Cox17 | F: CTGAATCGCAGGAGAAGAAG<br>R: TGGGCCTCAATTAGGTGTC     | NM_001348525.1   | 121      |
| Atox1 | F: CTCTAACGCAGTCACTCGGG<br>R: CAGACCTTCTTGTTGGGCA     | NM_001167641.2   | 79       |
| ATP7A | F: CAGGAGTAGGTGCTCAAAATG<br>R: ATGGGTAATGGTTCCAGTCTT  | AB271958.1       | 107      |
| ATP7B | F: GAACCCCAAGGCTCATCAC<br>R: CCGAGGAACTGGACAAAGG      | AB271959.1       | 228      |
| CCS   | F: CGATGAGGGAGAAGACGACC<br>R: AGCGAGCGATGATGCCA       | AY573056.1       | 98       |
| DMT1  | F: TCTTATGAGCATTGCCTACCT<br>R: AACCTTGGGATACTGACGG    | EU647217.1       | 199      |
| CYTB  | F: TACTTATGGGAGTGACCGAGA<br>R: GACTATCCAAAAAATGAGAGCC | AM268434.1       | 137      |
| Hp    | F: ATCTCCCACCATAACCTCACC<br>R: CCACCTCCTGTTTCTTTCCC   | NM_214000.2      | 157      |
| Tf    | F: AAACAGTGGTGGGAAAATAGAG<br>R: CCGCAATGTAGATGTAGCCT  | NM_001244653.1   | 119      |
| GAPDH | F: ATTCCACGGCACAGTCAA<br>R: AGCAGAAGGGGCAGAGAT        | AF017079.1       | 214      |
